# Supplementary material for: Efficacy of Medical Legal Partnerships to Address Health Harming Legal Needs: A Systematic Review of Experimental Studies in the Field
Source: Research Square preprint supplement (doi:10.21203/rs.3.rs-1625222/v1), 2022-06-14
Supplement: Supplementary file 1 [file b96a19c05f9663dfc1c85ede.docx]

**APPENDIX: search terms**

**A.** For key search terms in PUBMED:

((((((((((("medical legal partnership") OR ("medical legal partnerships")) OR ("medical-legal partnership")) OR ("medical-legal partnerships")) OR ("medical-legal practice")) OR ("medical-legal practices")) OR ("medical legal practice")) OR ("medical legal practices")) OR ("medical legal services")) OR ("medical legal service")) OR ("medical-legal service")) OR ("medical-legal services") OR ("legal-health clinic") OR ("legal-health")) OR ("legal health service")) OR ("legal-health service")) OR (((("legal-health clinic") OR ("legal-health")) OR ("legal health service")) OR ("legal-health service")))))))))))

**No restrictions on year, language, and country of publications**

**B.** Search terms in OVID-MEDLINE and EMBASE:

1. *"Social Determinants of Health"/ or "medical legal partnership".mp.

2. medical-legal.mp.

3. "legal-medical partnership".mp.

4. "medical-legal partnership".mp.

5. "Social Determinants of Health"/ or "medical legal partnership".mp.

6. "medical-legal practice".mp.

7. "medical legal practice".mp.

8. "medical-legal service".mp.

9. "Delivery of Health Care"/ and "medical legal partnership".mp. and *Legal Services/

10. Community Health Services/ and Legal Services/

11. health harming legal needs.mp.

12. ("Social Determinants of Health"/ or "health harming legal need".mp.) and *Patient-Centered Care/

13. ((control* or randomi?ed or random* or blind*) not ("systematic review" or "meta-analysis")).ti,ab,kf.

14. exp ANIMALS/ not HUMANS.sh.

15. (animal or canine or dog or dogs or rabbit or rat or rats or mouse or mice or pig or pigs or veterinary).ti,ab,kf.

16. 1 or 2 or 3 or 4 or 5 or 6 or 7 or 8 or 9 or 10 or 11 or 12

17. 14 and 15

18. 13 and 16

19. 18 not 17
